# Supplementary material for: Transient extracellular application of gold nanostars increases hippocampal neuronal activity
Source: PubMed Central journal article supplement (PMC4422288; doi:10.1186/s12951-014-0031-y), 2014-08-20
Supplement: s12951-014-0031-y-S1.pdf [file s12951-014-0031-y-S1.pdf]

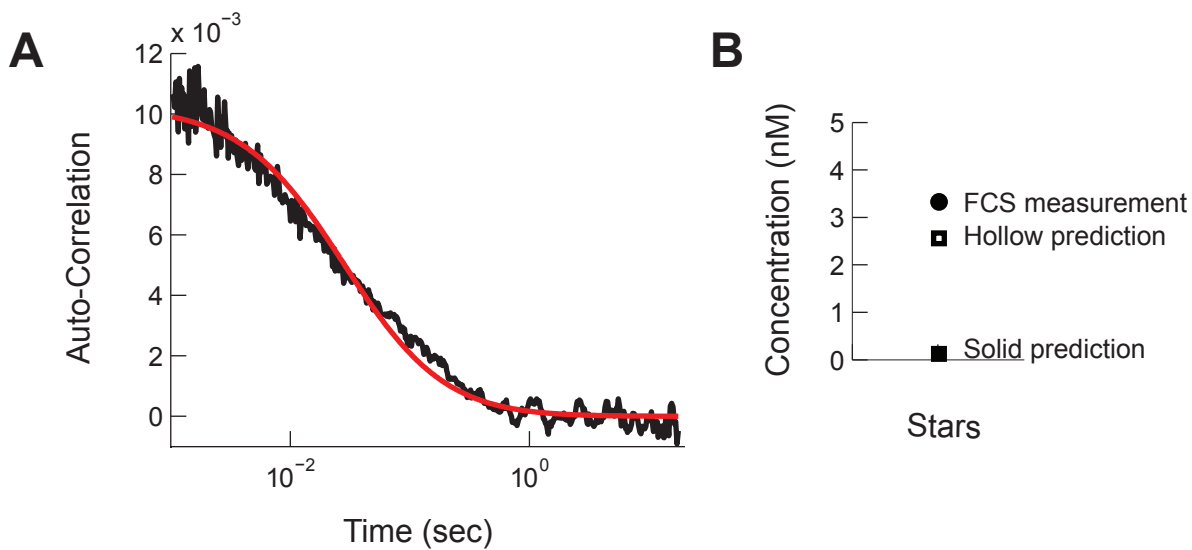

**Supplementary Material Figure 1.** Analysis of fluorescence correlation spectroscopy (FCS) measurements of star shaped nanoparticles. **(A)** Experimentally obtained auto-correlation curves (black) fitted with the FCS function (red). **(B)** Comparison of gold nanoparticle concentration extracted from A (solid circle) and predicted concentration based on chemical formulation and average shape assuming a hollow (hollow square) or solid (filled square) nanoparticle.
